# Supplementary material for: Tipping elements in the human intestinal ecosystem
Source: PubMed Central journal article supplement (PMC4102116; doi:10.1038/ncomms5344), 2014-07-08
Supplement: ncomms5344-s1.pdf [file ncomms5344-s1.pdf]

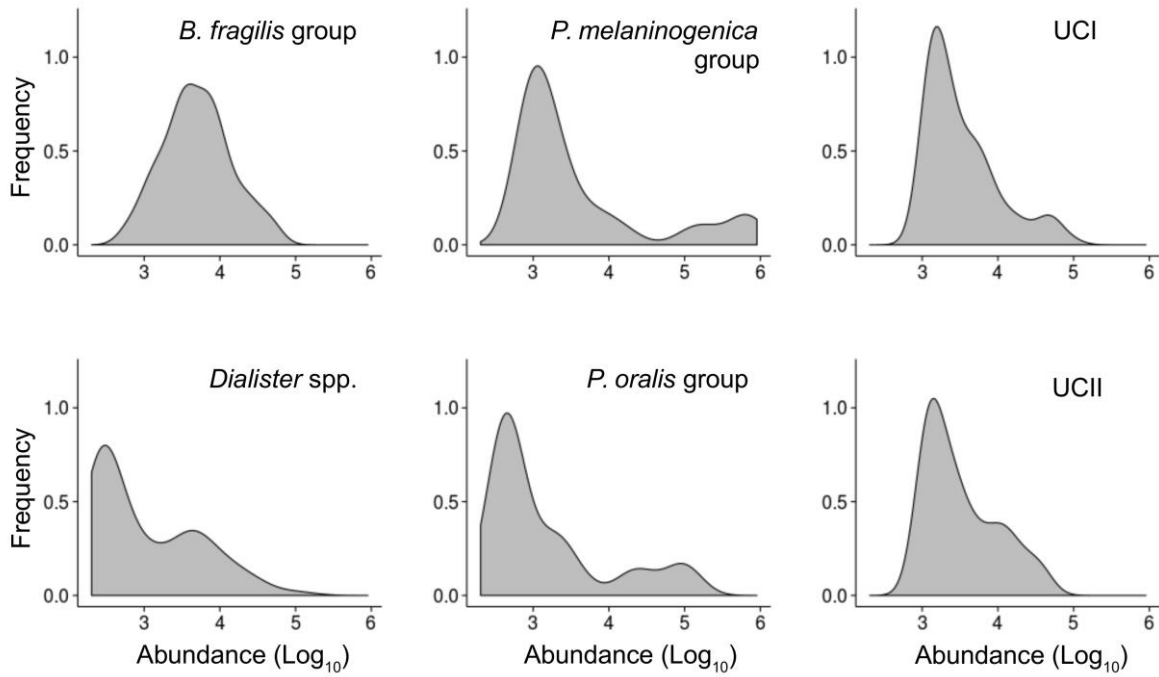

**Supplementary Fig. 1 Abundance distributions for control subjects** Logarithmic abundance distributions across 46 control subjects ( $n=92$  samples) from dietary intervention trials (Methods) show indications of bimodality. These control subjects received placebo, and were controlled for other external factors including probiotics and antibiotics use. The *B. fragilis* group is an exception with no indications of bimodality.

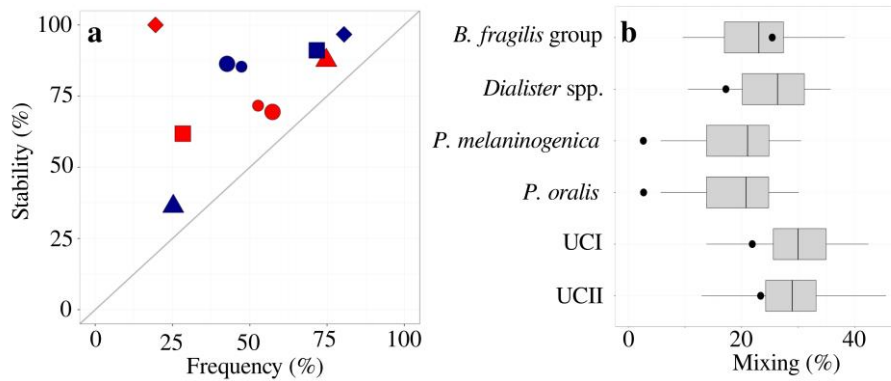

**Supplementary Fig. 2 State frequency and stability** (a) State frequency (fraction of subjects associated with the state) among the 1,006 western adults (horizontal axis) correlates with short-term stability of the state in the 78 follow-up subjects (vertical axis). The stability is quantified by the fraction of subjects remaining in their original state over a three-month interval, as estimated by Kaplan-Meier survival analysis (Methods). All bi-stable groups appear more stable than expected by random state allocation between the consecutive time points (gray line), the *Prevotella* group (◆) being the most stable (>97%). Symbols: *B. fragilis* group (▲), *Dialister* spp. (■), *Prevotella* group (◆), UCI (●), UCII (●); the blue and red color indicate the low- and high-abundance states, respectively. (b) State mixing within each bi-stable group compared to the expected mixing; the mixing is defined as the overall fraction of subjects who exhibit a state switch during the study interval. Since the observed state mixing could reflect natural, continuous fluctuations in bacterial abundance rather than abrupt shifts between contrasting stable states, we compared the mixing rates in the bi-stable taxa (black dots) to the 54 other prevalent, unimodal taxa (boxplots) with simulated low- and high-abundance states constructed based on the same population frequencies than in the corresponding bi-stable group. The *P. oralis* and *P. melaninogenica* groups appear the most stable, with less mixing than in any other group (100%). Also *Dialister* spp. (83%), UCI (93%) and UCII (78%) exhibit less mixing than most unimodal groups based on analogous, simulated tipping points. The *B. fragilis* group (35%) is an exception that appears less stable than most other taxa.

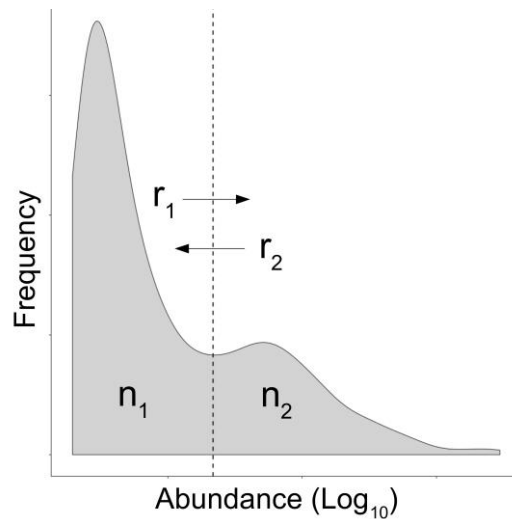

**Supplementary Fig. 3 Temporal dynamics of a bi-stable abundance distribution** The logarithmic abundance distribution for *Dialister* spp. exhibits two peaks of low and high abundance with the estimated state frequencies of  $n_1=72\%$  and  $n_2=28\%$  across the 1,006 western adults, respectively. In stationary state, the flow between the two states is balanced, and the ratio of the switching rates  $r$  should be inversely related to state frequencies  $n$  ( $r_1/r_2 = n_2/n_1$ ) assuming a stationary continuous-time Markov process. Hence the more frequent states are relatively more stable in the stationary state, while the absolute switching rates determine the overall mixing between the states during a given time interval. The tipping point (dashed line) marks the intermediate region between the alternative states of low and high abundance. In bi-stable systems the observations around this region have reduced stability<sup>1</sup>.

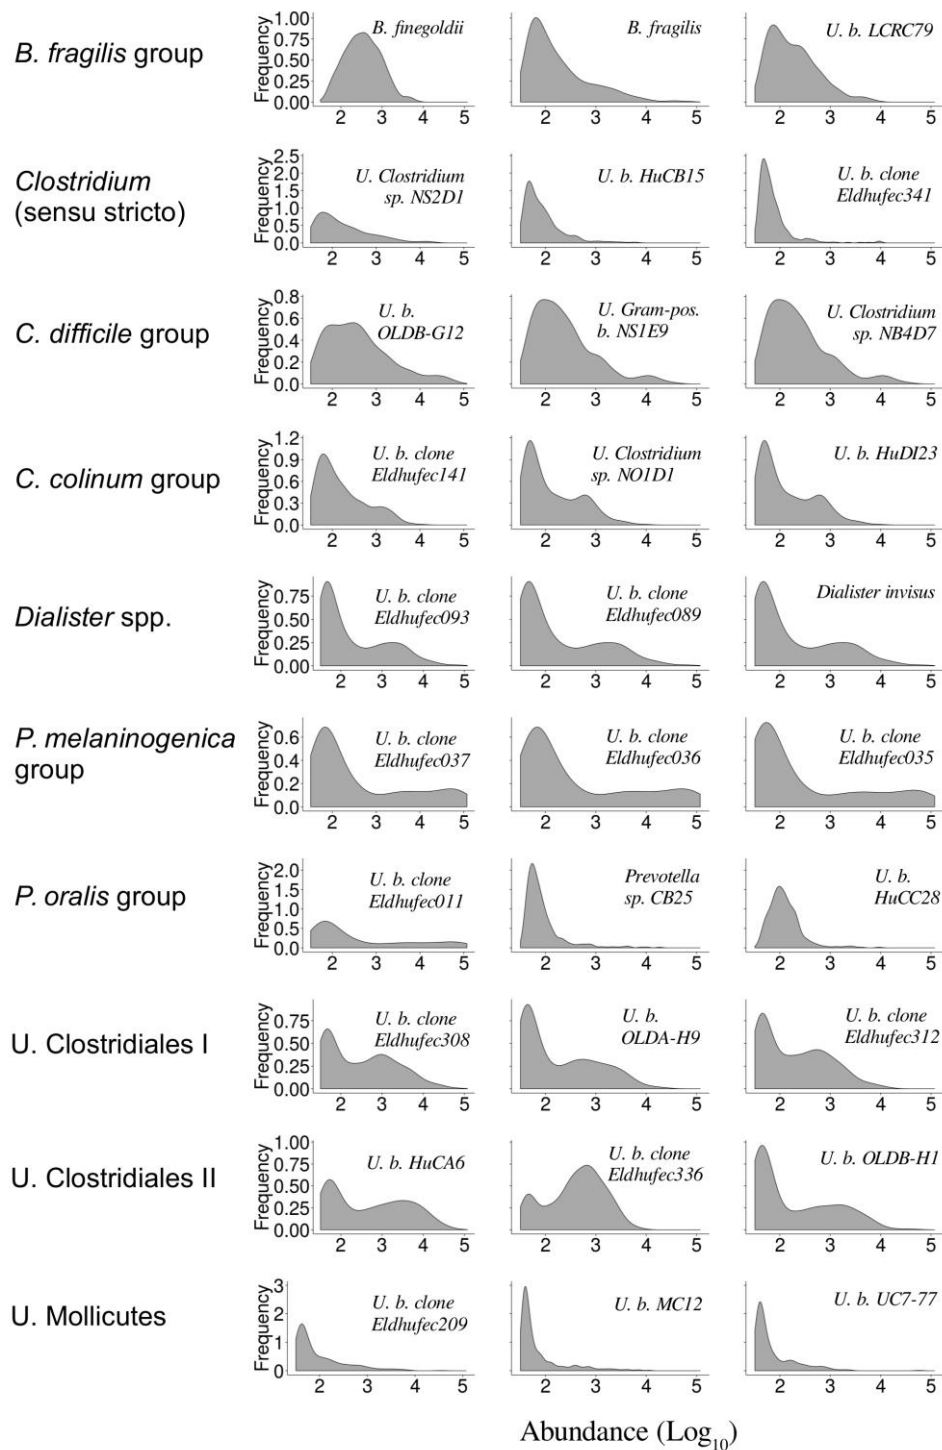

**Supplementary Fig. 4 Phylotype abundances for selected genus-like groups** Logarithmic abundance distributions for the three most prevalent phylotypes within the genus-like groups that show indications for bi-stability (main Fig. 4). Prevalent phylotypes based on our criteria (see Methods) are identified within the *Dialister* spp., relatives of *P. oralis* and *P. melaninogenica*, UCI and UCII groups. Abbreviations: Uncultured ('U. '); bacteria ('b.').

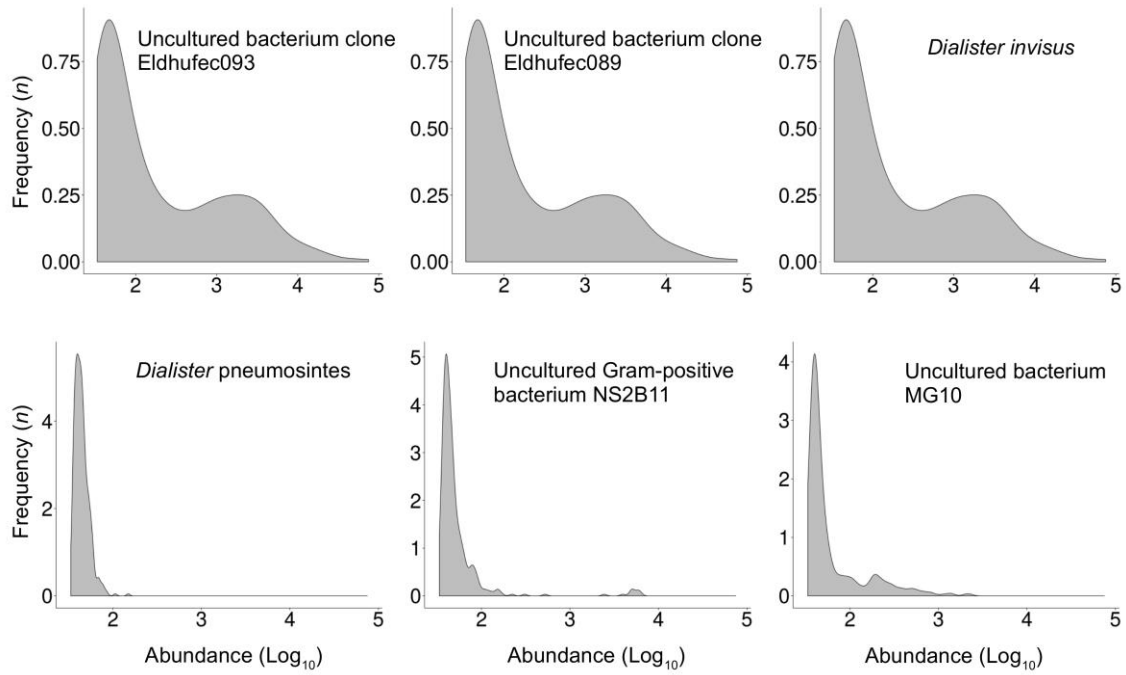

**Supplementary Fig. 5 Abundance distributions for the phylotypes within *Dialister* spp.**

Strong bimodality in the abundance distributions is observed in three phylotypes within the *Dialister* spp. (Uncultured bacterium clones Eldhufec093 and Eldhufec089; and *D. invisus*).

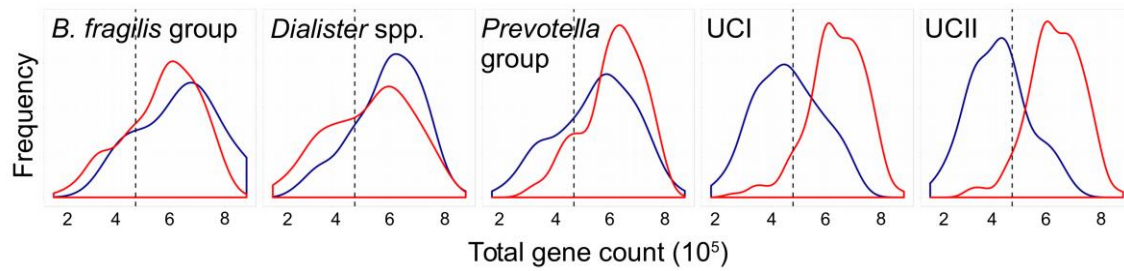

**Supplementary Fig. 6 Alternative states and gene richness** Total gene count for 255

subjects (39-72 years) in a metagenomic sequencing study<sup>2</sup>, where a bimodal gene count was reported; the corresponding threshold between the low and high gene count is indicated by the vertical dashed line. The total gene count distributions are illustrated separately for the subjects associated with the low- (blue) and high- (red) abundance state of each bi-stable group. The metagenomic gene count is significantly associated with all bi-stable groups ( $P < 0.01$ ; Wilcoxon test) except the *B. fragilis* group ( $P = 0.2$ ). *Dialister* spp. is associated with the low gene count<sup>2</sup>; the *Prevotella*, UCI and UCII groups are associated with high gene count.

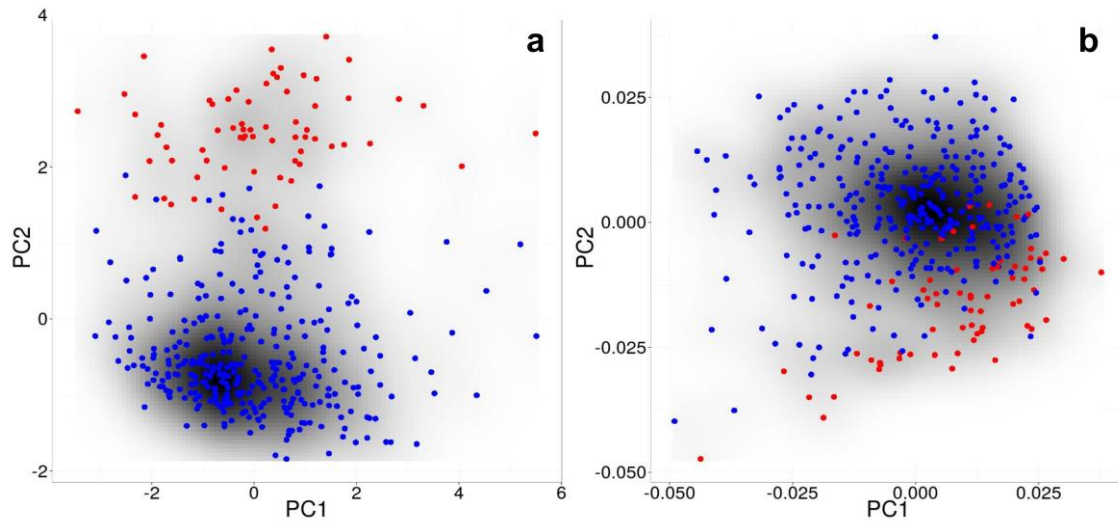

**Supplementary Fig. 7 Community-level variation (a)** Visualization of the two main axes of Principal Component Analysis based on the 130 genus-like groups across the 401 samples extracted with the mechanical lysis. The gray shading indicates the density of the data points. The second principal axis, driven by the *Prevotella* group (relatives of *P. melaninogenica* and *P. oralis*), explains 13% of the overall variance in the data. **(b)** Visualization of the same data based on Principal Coordinates Analysis with un-weighted UniFrac distances. The blue and red colors indicate subjects with the low and high abundance state of the *Prevotella* group based on our analysis, respectively.

---

|                   |                                                                                                                                                                                                                                                                                                                                                                                                                                                                                                                                                                                                                                                                                                                                                                                                                                                                                                                                                                                                                                                                                                                                                                                                                                                                                                                                                                                                                                                                                                                                                                                                                                                                                                                                                                                                                                                                                                                                                                                                                                                                                                                                                                   |
|-------------------|-------------------------------------------------------------------------------------------------------------------------------------------------------------------------------------------------------------------------------------------------------------------------------------------------------------------------------------------------------------------------------------------------------------------------------------------------------------------------------------------------------------------------------------------------------------------------------------------------------------------------------------------------------------------------------------------------------------------------------------------------------------------------------------------------------------------------------------------------------------------------------------------------------------------------------------------------------------------------------------------------------------------------------------------------------------------------------------------------------------------------------------------------------------------------------------------------------------------------------------------------------------------------------------------------------------------------------------------------------------------------------------------------------------------------------------------------------------------------------------------------------------------------------------------------------------------------------------------------------------------------------------------------------------------------------------------------------------------------------------------------------------------------------------------------------------------------------------------------------------------------------------------------------------------------------------------------------------------------------------------------------------------------------------------------------------------------------------------------------------------------------------------------------------------|
| Symmetric (34)    | <i>Akkermansia</i> ; <i>Allistipes et rel.</i> ; <i>Anaerostipes caccae et rel.</i> ; <i>Anaerovorax odorimutans et rel.</i> ; <i>Bacteroides ovatus et rel.</i> ; <i>Bacteroides plebeius et rel.</i> ; <i>Bacteroides uniformis et rel.</i> ; <i>Bacteroides vulgatus et rel.</i> ; <i>Bifidobacterium</i> ; <i>Bryantella formatexigens et rel.</i> ; <i>Clostridium cellulosi et rel.</i> ; <i>Clostridium leptum et rel.</i> ; <i>Clostridium nexile et rel.</i> ; <i>Clostridium orbiscindens et rel.</i> ; <i>Clostridium sphenoides et rel.</i> ; <i>Clostridium stercorarium et rel.</i> ; <i>Clostridium symbiosum et rel.</i> ; <i>Coprococcus eutactus et rel.</i> ; <i>Dorea formicigenerans et rel.</i> ; <i>Eubacterium hallii et rel.</i> ; <i>Eubacterium rectale et rel.</i> ; <i>Eubacterium ventriosum et rel.</i> ; <i>Lachnobacillus bovis et rel.</i> ; <i>Oscillospira guillermondii et rel.</i> ; Outgrouping clostridium cluster XIVa; <i>Oxalobacter formigenes et rel.</i> ; <i>Papillibacter cinnamivorans et rel.</i> ; <i>Roseburia intestinalis et rel.</i> ; <i>Ruminococcus bromii et rel.</i> ; <i>Ruminococcus callidus et rel.</i> ; <i>Ruminococcus gnavus et rel.</i> ; <i>Ruminococcus obeum et rel.</i> ; <i>Sporobacter termitidis et rel.</i> ; <i>Tannerella et rel.</i>                                                                                                                                                                                                                                                                                                                                                                                                                                                                                                                                                                                                                                                                                                                                                                                                                                              |
| Left-skewed (4)   | <i>Butyrivibrio crossotus et rel.</i> ; <i>Faecalibacterium prausnitzii et rel.</i> ; <i>Lachnospira pectinoschiza et rel.</i> ; <i>Subdoligranulum variable et rel.</i>                                                                                                                                                                                                                                                                                                                                                                                                                                                                                                                                                                                                                                                                                                                                                                                                                                                                                                                                                                                                                                                                                                                                                                                                                                                                                                                                                                                                                                                                                                                                                                                                                                                                                                                                                                                                                                                                                                                                                                                          |
| Right-skewed (16) | <i>Anaerotruncus colihominis et rel.</i> ; <i>Bacteroides splachnicus et rel.</i> ; <i>Bacteroides stercoris et rel.</i> ; <i>Clostridium (sensu stricto)</i> ; <i>Clostridium colinum et rel.</i> ; <i>Clostridium difficile et rel.</i> ; <i>Collinsella</i> ; <i>Eubacterium bifforme et rel.</i> ; <i>Lactobacillus plantarum et rel.</i> ; <i>Parabacteroides distasonis et rel.</i> ; <i>Prevotella tanneriae et rel.</i> ; <i>Ruminococcus lactaris et rel.</i> ; <i>Streptococcus bovis et rel.</i> ; <i>Streptococcus mitis et rel.</i> ; <i>Sutterella wadsworthia et rel.</i> ; Uncultured Mollicutes                                                                                                                                                                                                                                                                                                                                                                                                                                                                                                                                                                                                                                                                                                                                                                                                                                                                                                                                                                                                                                                                                                                                                                                                                                                                                                                                                                                                                                                                                                                                                  |
| Bimodal (6)       | <i>Bacteroides fragilis et rel.</i> ; <i>Dialister spp.</i> ; <i>Prevotella melaninogenica et rel.</i> ; <i>Prevotella oralis et rel.</i> ; Uncultured Clostridiales I; Uncultured Clostridiales II                                                                                                                                                                                                                                                                                                                                                                                                                                                                                                                                                                                                                                                                                                                                                                                                                                                                                                                                                                                                                                                                                                                                                                                                                                                                                                                                                                                                                                                                                                                                                                                                                                                                                                                                                                                                                                                                                                                                                               |
| Rare (70)         | Actinomycetaceae; <i>Aerococcus</i> ; <i>Aeromonas</i> ; <i>Alcaligenes faecalis et rel.</i> ; <i>Anaerobiospirillum</i> ; <i>Anaerofustis</i> ; <i>Aneurinibacillus</i> ; <i>Aquabacterium</i> ; <i>Asteroleplasma et rel.</i> ; <i>Atopobium</i> ; <i>Bacillus</i> ; <i>Bacteroides intestinalis et rel.</i> ; <i>Bilophila et rel.</i> ; <i>Brachyspira</i> ; <i>Bulleidia moorei et rel.</i> ; <i>Burkholderia</i> ; <i>Campylobacter</i> ; <i>Catenibacterium mitsuokai et rel.</i> ; <i>Clostridium felsineum et rel.</i> ; <i>Clostridium ramosum et rel.</i> ; <i>Clostridium thermocellum et rel.</i> ; <i>Coprobacillus catenaformis et rel.</i> ; <i>Corynebacterium</i> ; <i>Desulfovibrio et rel.</i> ; <i>Eggerthella lenta et rel.</i> ; <i>Enterobacter aerogenes et rel.</i> ; <i>Enterococcus</i> ; <i>Escherichia coli et rel.</i> ; <i>Eubacterium cylindroides et rel.</i> ; <i>Eubacterium limosum et rel.</i> ; <i>Eubacterium siraeum et rel.</i> ; <i>Fusobacteria</i> ; <i>Gemella</i> ; <i>Granulicatella</i> ; <i>Haemophilus</i> ; <i>Helicobacter</i> ; <i>Klebsiella pneumoniae et rel.</i> ; <i>Lactobacillus catenaformis et rel.</i> ; <i>Lactobacillus gasseri et rel.</i> ; <i>Lactobacillus salivarius et rel.</i> ; <i>Lactococcus</i> ; <i>Leminorella</i> ; <i>Megamonas hypermegale et rel.</i> ; <i>Megasphaera elsdenii et rel.</i> ; <i>Methylobacterium</i> ; <i>Micrococcaceae</i> ; <i>Mitsuokella multiacida et rel.</i> ; <i>Moraxellaceae</i> ; <i>Novosphingobium</i> ; <i>Oceanospirillum</i> ; <i>Peptococcus niger et rel.</i> ; <i>Peptostreptococcus anaerobius et rel.</i> ; <i>Peptostreptococcus micros et rel.</i> ; <i>Phascolarctobacterium faecium et rel.</i> ; <i>Prevotella ruminicola et rel.</i> ; <i>Propionibacterium</i> ; <i>Proteus et rel.</i> ; <i>Pseudomonas</i> ; <i>Serratia</i> ; <i>Staphylococcus</i> ; <i>Streptococcus intermedius et rel.</i> ; Uncultured Bacteroidetes; Uncultured Chroococcales; Uncultured Selenomonadaceae; <i>Veillonella</i> ; <i>Vibrio</i> ; <i>Weissella et rel.</i> ; <i>Wissella et rel.</i> ; <i>Xanthomonadaceae</i> ; <i>Yersinia et rel.</i> |

---

**Supplementary Table 1 Bacterial abundance types** Characteristic abundance types of the

130 genus-like bacterial groups quantified by the phylogenetic HITChip microarray. The genus-like groups (>90% sequence similarity in the 16S rRNA gene) are referred to as *type species* and relatives, the latter being shortened as “*et rel.*”<sup>3</sup>. The symmetric, skewed, bimodal, and rare abundance types are illustrated in main Fig. 2.



|                           | <b>Genus-like group</b>                   | <b>Species-level phylotypes</b>          | <b>Accession number</b>                |                            |                                       |          |
|---------------------------|-------------------------------------------|------------------------------------------|----------------------------------------|----------------------------|---------------------------------------|----------|
| Bacteroidetes             | <i>Bacteroides fragilis et rel.</i>       | bacterium adhufec23                      | AF132251                               |                            |                                       |          |
|                           |                                           | bacterium adhufec355                     | AF132263                               |                            |                                       |          |
|                           |                                           | <i>Bacteroides thetaiotaomicron</i>      | L16489                                 |                            |                                       |          |
|                           |                                           | <i>Bacteroides fragilis</i>              | M11656                                 |                            |                                       |          |
|                           |                                           | Uncultured bacterium MR34                | AY916210                               |                            |                                       |          |
|                           |                                           | Uncultured bacterium Z091                | AY916178                               |                            |                                       |          |
|                           |                                           | Uncultured bacterium LCLC32              | AF499834                               |                            |                                       |          |
|                           |                                           | Uncultured bacterium LCRC79              | AF499852                               |                            |                                       |          |
|                           |                                           | <i>Bacteroides finegoldii</i>            | AB222699                               |                            |                                       |          |
|                           |                                           | <i>Bacteroides nordii</i>                | AY608697                               |                            |                                       |          |
|                           |                                           | <i>Bacteroides salyersiae</i>            | AY608696                               |                            |                                       |          |
|                           |                                           | <i>Prevotella melaninogenica et rel.</i> | bacterium adhufec235                   | AF132249                   |                                       |          |
|                           |                                           |                                          | bacterium adhufec43                    | AY920192                   |                                       |          |
|                           |                                           |                                          | <i>Prevotella albensis</i>             | AJ011683                   |                                       |          |
|                           |                                           |                                          | <i>Prevotella intermedia</i>           | AF414821                   |                                       |          |
|                           |                                           |                                          | <i>Prevotella salivae</i>              | AB108826                   |                                       |          |
|                           |                                           |                                          | <i>Prevotella</i> sp. BI-42            | AJ581354                   |                                       |          |
|                           |                                           |                                          | <i>Prevotella</i> sp. CB7              | AB064923                   |                                       |          |
|                           |                                           |                                          | <i>Prevotella melaninogenica</i>       | L16469                     |                                       |          |
|                           |                                           |                                          | Uncultured bacterium clone Eldhufec008 | AY919883                   |                                       |          |
|                           | Uncultured bacterium clone Eldhufec007    |                                          | AY919882                               |                            |                                       |          |
|                           | Uncultured bacterium clone Eldhufec038    |                                          | AY919913                               |                            |                                       |          |
|                           | Uncultured bacterium clone Eldhufec037    |                                          | AY919912                               |                            |                                       |          |
|                           | Uncultured bacterium clone Eldhufec036    |                                          | AY919911                               |                            |                                       |          |
|                           | Uncultured bacterium clone Eldhufec035    |                                          | AY919910                               |                            |                                       |          |
|                           | Uncultured bacterium B176                 |                                          | AY916316                               |                            |                                       |          |
|                           | Uncultured bacterium M107                 |                                          | AY916148                               |                            |                                       |          |
|                           | Uncultured bacterium OLDC-A6              |                                          | AB099766                               |                            |                                       |          |
|                           | Uncultured <i>Prevotella</i> sp. NB2E9    |                                          | AB064832                               |                            |                                       |          |
|                           | <i>Prevotella oralis et rel.</i>          |                                          | <i>Prevotella buccalis</i>             | L16476                     |                                       |          |
|                           |                                           |                                          | <i>Prevotella oralis</i>               | L16480                     |                                       |          |
|                           |                                           | <i>Prevotella</i> sp. CB25               | AB064924                               |                            |                                       |          |
|                           |                                           | Uncultured bacterium HuCC28              | AJ315483                               |                            |                                       |          |
|                           |                                           | Uncultured bacterium clone Eldhufec011   | AY919886                               |                            |                                       |          |
|                           |                                           | Uncultured bacterium clone Eldhufec043   | AY919918                               |                            |                                       |          |
|                           |                                           | Firmicutes;<br>Clostridium cluster IX    | <i>Dialister</i> spp.                  | <i>Dialister invisus</i>   | AY162469                              |          |
|                           | <i>Dialister pneumosintes</i>             |                                          |                                        | X82500                     |                                       |          |
|                           | Uncultured Gram-positive bacterium NS2B11 |                                          |                                        | AB064859                   |                                       |          |
|                           | Uncultured bacterium clone Eldhufec093    |                                          |                                        | AY919968                   |                                       |          |
|                           | Uncultured bacterium clone Eldhufec089    |                                          |                                        | AY919964                   |                                       |          |
|                           | Uncultured bacterium MG10                 |                                          |                                        | AY982155                   |                                       |          |
|                           | Firmicutes;<br>Uncultured Clostridiales   |                                          |                                        | Uncultured Clostridiales I | Uncultured human gut bacterium JW2B4  | AB080852 |
|                           |                                           |                                          |                                        |                            | Uncultured human gut bacterium JW2F12 | AB080851 |
|                           |                                           |                                          |                                        |                            | Uncultured bacterium OLDA-C7          | AB099786 |
|                           |                                           |                                          |                                        |                            | Uncultured bacterium OLDA-F6          | AB099785 |
|                           |                                           | Uncultured bacterium OLDA-F7             | AB099784                               |                            |                                       |          |
|                           |                                           | Uncultured bacterium OLDA-H9             | AB099782                               |                            |                                       |          |
|                           |                                           | Uncultured bacterium OLDB-A9             | AB099783                               |                            |                                       |          |
|                           |                                           | Uncultured bacterium OLDCA-1             | AB099781                               |                            |                                       |          |
|                           |                                           | Uncultured bacterium C118                | AY916326                               |                            |                                       |          |
|                           |                                           | Uncultured bacterium C257                | AY916329                               |                            |                                       |          |
|                           | Uncultured bacterium C627                 | AY916340                                 |                                        |                            |                                       |          |
|                           | Uncultured bacterium D049                 | AY916352                                 |                                        |                            |                                       |          |
| Uncultured bacterium D279 | AY916363                                  |                                          |                                        |                            |                                       |          |
| Uncultured bacterium D693 | AY916381                                  |                                          |                                        |                            |                                       |          |
| Uncultured bacterium LH65 | AY916208                                  |                                          |                                        |                            |                                       |          |
| Uncultured bacterium M220 | AY916150                                  |                                          |                                        |                            |                                       |          |
| Uncultured bacterium M233 | AY916151                                  |                                          |                                        |                            |                                       |          |
| Uncultured bacterium M412 | AY916156                                  |                                          |                                        |                            |                                       |          |
| Uncultured bacterium M621 | AY916165                                  |                                          |                                        |                            |                                       |          |

---

|                             |                                        |          |
|-----------------------------|----------------------------------------|----------|
|                             | Uncultured bacterium MF22              | AY916236 |
|                             | Uncultured bacterium MF35              | AY916239 |
|                             | Uncultured bacterium MG86              | AY916291 |
|                             | Uncultured bacterium NH06              | AY916173 |
|                             | Uncultured bacterium clone Eldhufec308 | AY920183 |
|                             | Uncultured bacterium clone Eldhufec312 | AY920187 |
|                             | Uncultured bacterium clone Eldhufec314 | AY920189 |
|                             | Uncultured bacterium clone Eldhufec316 | AY920191 |
|                             | Uncultured bacterium clone Eldhufec317 | AY920192 |
|                             | Uncultured bacterium UC7-9             | AJ608227 |
|                             | Uncultured bacterium UC7-127           | AJ608249 |
| Uncultured Clostridiales II | Uncultured human gut bacterium JW2H12  | AB080880 |
|                             | Uncultured bacterium OLDB-C2           | AB099778 |
|                             | Uncultured bacterium C736              | AY916346 |
|                             | Uncultured bacterium LQ86              | AY916269 |
|                             | Uncultured bacterium M501              | AY916160 |
|                             | Uncultured bacterium clone Eldhufec333 | AY920208 |
|                             | Uncultured bacterium clone Eldhufec332 | AY920207 |
|                             | Uncultured bacterium cadhufec18c08     | AF530351 |
|                             | Uncultured bacterium cadhufec17f05     | AF530343 |
|                             | Uncultured bacterium OLDB-H1           | AB099779 |
|                             | Uncultured bacterium OLDB-F4           | AB099777 |
|                             | Uncultured bacterium OLDC-A2           | AB099780 |
|                             | Uncultured bacterium C583              | AY916338 |
|                             | Uncultured bacterium C655              | AY916341 |
|                             | Uncultured bacterium D191              | AY916361 |
|                             | Uncultured bacterium K342              | AY916195 |
|                             | Uncultured bacterium M403              | AY916155 |
|                             | Uncultured bacterium MH87              | AY916298 |
|                             | Uncultured bacterium MM92              | AY916304 |
|                             | Uncultured bacterium HuCA6             | AJ408962 |
|                             | Uncultured bacterium clone Eldhufec328 | AY920203 |
|                             | Uncultured bacterium clone Eldhufec329 | AY920204 |
|                             | Uncultured bacterium clone Eldhufec334 | AY920209 |
|                             | Uncultured bacterium clone Eldhufec336 | AY920211 |
|                             | Uncultured human gut bacterium JW1H11  | AB080881 |
|                             | Uncultured human gut bacterium JW1B2   | AB080879 |

---

### Supplementary Table 2 Phylotype-level characterization of the bimodal groups

Cultivated species and uncultured phylotypes ( $\geq 98\%$  16S rRNA gene sequence similarity) that constitute the six bimodal genus-like phylogenetic groups targeted by the HITChip microarray<sup>3</sup>. The right-most column lists the corresponding NCBI accession numbers.

| UCI  | RDP sequence                                                                                        | HITChip phylotype name                 | Accession |
|------|-----------------------------------------------------------------------------------------------------|----------------------------------------|-----------|
|      | Firmicutes; Clostridia; Clostridiales; <i>Ruminococcaceae</i> ; <i>Acetivibrio</i>                  |                                        |           |
|      | uncultured bacterium; C118                                                                          | uncultured bacterium C118              | AY916326  |
|      | uncultured bacterium; Eldhufec308                                                                   | Uncultured bacterium clone Eldhufec308 | AY920183  |
|      | uncultured bacterium; Eldhufec312                                                                   | Uncultured bacterium clone Eldhufec312 | AY920187  |
|      | uncultured bacterium; Eldhufec314                                                                   | Uncultured bacterium clone Eldhufec314 | AY920189  |
|      | uncultured bacterium; Eldhufec317                                                                   | Uncultured bacterium clone Eldhufec317 | AY920192  |
|      | uncultured bacterium; D049                                                                          | uncultured bacterium D049              | AY916352  |
|      | Uncultured bacterium; M220                                                                          | uncultured bacterium M220              | AY916150  |
|      | uncultured bacterium; MF22                                                                          | uncultured bacterium MF22              | AY916236  |
|      | uncultured bacterium; MF35                                                                          | uncultured bacterium MF35              | AY916239  |
|      | uncultured bacterium; NH06                                                                          | uncultured bacterium NH06              | AY916173  |
|      | Firmicutes; Clostridia; Clostridiales; <i>Ruminococcaceae</i> ; unclassified <i>Ruminococcaceae</i> |                                        |           |
|      | uncultured bacterium; Eldhufec316                                                                   | Uncultured bacterium clone Eldhufec316 | AY920191  |
|      | uncultured bacterium; C257                                                                          | uncultured bacterium C257              | AY916329  |
|      | uncultured bacterium; C627                                                                          | uncultured bacterium C627              | AY916340  |
|      | uncultured bacterium; M233                                                                          | uncultured bacterium M233              | AY916151  |
|      | uncultured bacterium; M412                                                                          | uncultured bacterium M412              | AY916156  |
|      | uncultured bacterium; MG86                                                                          | uncultured bacterium MG86              | AY916291  |
|      | uncultured bacterium; OLDA-F6                                                                       | uncultured bacterium OLDA-F6           | AB099785  |
|      | uncultured bacterium; UC7-127                                                                       | Uncultured bacterium UC7-127           | AJ608249  |
|      | uncultured bacterium; UC7-9                                                                         | Uncultured bacterium UC7-9             | AJ608227  |
|      | Firmicutes; Clostridia; Clostridiales; unclassified Clostridiales                                   |                                        |           |
|      | uncultured bacterium; D279                                                                          | uncultured bacterium D279              | AY916363  |
|      | uncultured bacterium; D693                                                                          | uncultured bacterium D693              | AY916381  |
|      | uncultured bacterium; LH65                                                                          | uncultured bacterium LH65              | AY916208  |
|      | uncultured bacterium DGGE gel band; 128-BL-00-B1                                                    | uncultured bacterium M621              | AY574526  |
|      | uncultured bacterium; OLDA-C7                                                                       | uncultured bacterium OLDA-C7           | AB099786  |
|      | uncultured human intestinal bacterium; JW2B4                                                        | uncultured human gut bacterium JW2B4   | AB080852  |
|      | uncultured human intestinal bacterium; JW2F12                                                       | uncultured human gut bacterium JW2F12  | AB080851  |
|      | Firmicutes; unclassified Firmicutes                                                                 |                                        |           |
|      | uncultured bacterium; OLDB-A9                                                                       | uncultured bacterium OLDB-A9           | AB099783  |
|      | uncultured bacterium; OLDA-H9                                                                       | uncultured bacterium OLDA-H9           | AB099782  |
|      | unclassified Bacteria                                                                               |                                        |           |
|      | uncultured bacterium; OLDC-A1                                                                       | uncultured bacterium OLDC-A1           | AB099781  |
|      | uncultured bacterium; OLDA-F7                                                                       | uncultured bacterium OLDA-F7           | AB099784  |
| UCII | RDP sequence                                                                                        | HITChip phylotype name                 | Accession |
|      | Firmicutes; Clostridia; Clostridiales; unclassified Clostridiales                                   |                                        |           |
|      | uncultured bacterium; C583                                                                          | uncultured bacterium C583              | AY916338  |
|      | uncultured bacterium; D191                                                                          | uncultured bacterium D191              | AY916361  |
|      | uncultured bacterium; K342                                                                          | uncultured bacterium K342              | AY916195  |
|      | uncultured bacterium; LQ86                                                                          | uncultured bacterium LQ86              | AY916269  |
|      | uncultured bacterium; MH87                                                                          | uncultured bacterium MH87              | AY916298  |
|      | uncultured bacterium; MM92                                                                          | uncultured bacterium MM92              | AY916304  |
|      | uncultured bacterium; M501                                                                          | uncultured bacterium M501              | AY916160  |

|                                                       |                                        |          |
|-------------------------------------------------------|----------------------------------------|----------|
| uncultured human intestinal bacterium; JW2H12         | uncultured human gut bacterium JW2H12  | AB080880 |
| uncultured human intestinal bacterium; JW1H11         | uncultured human gut bacterium JW1H11  | AB080881 |
| uncultured bacterium; OLDB-F4                         | uncultured bacterium OLDB-F4           | AB099777 |
| uncultured bacterium; OLDB-H1                         | uncultured bacterium OLDB-H1           | AB099779 |
| uncultured bacterium; M403                            | uncultured bacterium M403              | AY916155 |
| uncultured bacterium; Eldhufec328                     | Uncultured bacterium clone Eldhufec328 | AY920203 |
| uncultured bacterium; Eldhufec329                     | Uncultured bacterium clone Eldhufec329 | AY920204 |
| uncultured bacterium; sd56                            | Uncultured bacterium clone Eldhufec333 | EU201635 |
| uncultured bacterium; Eldhufec334                     | Uncultured bacterium clone Eldhufec334 | AY920209 |
| uncultured bacterium; Eldhufec336                     | Uncultured bacterium clone Eldhufec336 | AY920211 |
| uncultured bacterium; C655                            | uncultured bacterium C655              | AY916341 |
| uncultured bacterium; cadhufec17f05sav                | uncultured bacterium cadhufec17f05     | AF530343 |
| uncultured bacterium; cadhufec18c08sav                | uncultured bacterium cadhufec18c08     | AF530351 |
| Firmicutes; unclassified Firmicutes                   |                                        |          |
| uncultured bacterium; OLDC-A2                         | uncultured bacterium OLDC-A2           | AB099780 |
| uncultured bacterium; Eldhufec332                     | Uncultured bacterium clone Eldhufec332 | AY920207 |
| unclassified Bacteria                                 |                                        |          |
| uncultured bacterium; 128g07                          | uncultured bacterium C736              | AJ812148 |
| uncultured bacterium; OLDB-C2                         | uncultured bacterium OLDB-C2           | AB099778 |
| uncultured human intestinal bacterium; JW1B2          | uncultured human gut bacterium JW1B2   | AB080879 |
| uncultured bacterium from human colonic sample; HuCA6 | uncultured bacterium HuCA6             | AJ408962 |

### Supplementary Table 3 Phylogenetic characterization of the UCI and UCII groups

Ribosomal Database Project (RDP)<sup>4</sup> alignment for the 16S rRNA target sequences of Uncultured Clostridiales I and II (UCI and UCII) detected with the HITChip microarray (October 2013). The RDP match score is 1 for all HITChip phylotypes except the UCII Uncultured bacterium clone Eldhufec333 (0.963). All sequences belong to the domain Bacteria. The RDP sequences are grouped according to their Phylum, Class, Order, Family and Genus; these are indicated up to the highest accessible taxonomic level, separated by semicolon.

| Health status          | Bimodal group            | Enriched state | Compromised (%) | Controls (%) | FDR (%) |
|------------------------|--------------------------|----------------|-----------------|--------------|---------|
| Severe obesity (n=136) | UCI                      | Low abundance  | 29              | 55           | <0.1    |
| Severe obesity         | UCII                     | Low abundance  | 38              | 61           | <0.1    |
| IBS (n=106)            | UCII                     | Low abundance  | 50              | 61           | 1       |
| MetS (n=66)            | <i>B. fragilis</i> group | High abundance | 89              | 78           | <0.1    |
| MetS                   | <i>Prevotella</i> group  | Low abundance  | 11              | 22           | 11      |
| MetS                   | <i>Dialister</i> spp.    | High abundance | 36              | 28           | 13      |

**Supplementary Table 4 Associations between health status and the bimodal taxa** The

column ('Enriched state') indicates the state associated with the disease. The fourth ('Compromised') and fifth ('Controls') columns show the proportion of subjects in the high-abundance state in the compromised and the healthy controls, respectively. To control for differences in subject characteristics or sample treatment between the two groups, we estimated the significance based on multiple logistic regression corrected for age, sex, body-mass index, and DNA extraction method using the log-ratio test followed by Benjamini-Hochberg correction. The associations with FDR<20% are shown.

## Supplementary Notes

**Supplementary Note 1 Phylogenetic analysis of the Uncultured Clostridiales I-II** For the uncultured UCI and UCII groups that do not include any cultured representatives we performed a 16S rRNA target gene sequences alignment against the RDP database<sup>4</sup> to update their phylogenetic assignments. The majority (19/30) of the phylotypes within the UCI group were identified as members of family Ruminococcaceae, and 12 could be further assigned to genus *Acetivibrio* (Supplementary Table 3). Uncultured bacterium clones Eldhufec308 and Eldhufec312 exhibited clear bimodality (Supplementary Fig. 4). Similar abundance distributions characterized also the phylotypes within the UCII group, which could not be identified further down than order Clostridiales.

**Supplementary Note 2 Cross-hybridization control** Cross-hybridization can reduce the accuracy of observations in microarray analyses. We controlled this based on pre-calculated cross-alignment tables between the taxonomic groups targeted by the HITChip microarray. Cross-hybridization was negligible (<10%) between the bimodal groups and other taxa. The *B. fragilis* group, targeted by 40 probes, was an exception with 43% of shared probes with the *B. ovatus* group. Since this could potentially contribute to the bimodality of the *B. fragilis* abundance distribution, we investigated the 16 probes that were specific for the *B. fragilis* group. Bimodal abundance patterns were detected in 25% of the unique probes, suggesting that this group may contain both bimodal and smoothly varying higher-level phylotypes. The highly correlated *P. oralis* and *P. melaninogenica* groups had 13-26% shared probes. The correlation between these two groups remained high (0.81) after excluding the shared probes, however, confirming positive association. To avoid potential biases associated with different DNA extraction methods, the correlations between phylogenetic groups were calculated based on the 401 samples analysed with the mechanical lysis (see Methods).

**Supplementary Note 3 HITChip phylogeny** The HITChip phylogeny is binned at three taxonomic levels based on 16S sequence similarity, roughly corresponding to species/phylotype (98% 16S sequence similarity;  $n=1033$ ) and genus (90%;  $n=130$ ) levels, that are further classified into 23 higher-level groups including 10 phyla. In the present work we primarily focus on the genus level, which is less prone to cross-hybridization between closely related targets than the higher-resolution phylotype-level analysis.

**Supplementary Note 4 Community diversity** We quantified the overall community diversity by the Shannon index of the probe-level HITChip data (3631 probes targeting 1033 phylotypes) within the subset of 255 samples that were also analyzed for metagenomic richness (gene count)<sup>2</sup>.

**Supplementary Note 5 Bimodality significance** As the standard Potential Analysis approach does not provide p-values for the observed bimodal patterns, we derived empirical pseudo-p-values for each taxon as the fraction of bootstrap samples that did not support the bimodality to obtain the following estimates of false discovery rates<sup>5</sup>: *Prevotella* <2%; *Dialister* spp., UCI and UCII 10%; and *B. fragilis* 25%.

**Supplementary Note 6 DNA extraction bias** When all samples with varying DNA extraction methods were included, we observed bimodal patterns also in bifidobacteria and ruminococci that thus appear to be confounded by different extraction methods, highlighting the necessity to take the extraction method into account in meta-analyses that integrate data across independent studies.

**Supplementary Note 7 Kaplan-Meier analysis** This is an approximation, however, as the changes in bacterial abundance are continuous and reversible unlike the life/death processes, and natural continuous fluctuations in bacterial abundance may induce some observed state shifts.

**Supplementary Note 8 Community-level analysis** A variety of methodologies have been suggested to detect community-level multimodality in microbiota profiling data. Such analysis can be sensitive to the choice of dissimilarity measure, clustering method, and the approach for validating the number of clusters<sup>6</sup>. Popular dissimilarity measures include Jensen-Shannon divergence, beta diversity measures, and correlation analyses. Partition Around Medoids (PAM) has been frequently used as a clustering method, and common methodologies for cluster number validation include the Kalinski-Harabasz, Silhouette width, and the Prediction Strength Index<sup>6,7</sup>.

### Supplementary References

1. Scheffer M. *Critical Transitions in Nature and Society*. Princeton University Press, New Jersey, United States (2009).
2. Chatelier E.L. *et al.* Richness of human gut microbiome correlates with metabolic markers. *Nature* **500**, 541-546 (2013).
3. Rajilić-Stojanović M. *et al.* Development and application of the human intestinal tract chip, a phylogenetic microarray: analysis of universally conserved phylotypes in the abundant microbiota of young and elderly adults. *Environ. Microbiol.* **11**, 1736-1751 (2009).
4. Cole, J.R. *et al.* The Ribosomal Database Project: improved alignments and new tools for rRNA analysis. *Nucleic Acids Res.* **37**, D141 (2009).
5. Storey J.D., Tibshirani R. Statistical significance for genome-wide studies. *Proc. Nat'l. Acad. Sci. USA* **100**, 9440-9445 (2003).
6. Koren, O. *et al.* A guide to enterotypes across the human body: meta-analysis of microbial community structures in human microbiome datasets. *PLoS Comp. Biol.* **9**, e1006863 (2013).



7. Tibshirani R., Walter G. Cluster validation by Prediction Strength. *J. Comp. Graph. Stat.* **14**, 511-528 (2005).
